# Supplementary material for: Multilayer-structured transparent MXene/PVDF film with excellent dielectric and energy storage performance
Source: Royal Society of Chemistry journal article supplement (doi:10.1039/c9tc02715g), 2019-01-01
Supplement: c9tc02715g1.pdf [file c9tc02715g1.pdf]

## Supporting Information

### **Multilayer-Structured Transparent MXene/PVDF Film with Excellent Dielectric and Energy Storage Performances**

Weiyang Li <sup>a, b</sup>, Zhongqian Song <sup>a</sup>, Jiaming Zhong <sup>a, b</sup>, Jing Qian <sup>a, b</sup>, Zhongyang Tan <sup>a</sup>,  
Xianyou Wu <sup>a, b</sup>, Huiying Chu <sup>a, b</sup>, Wei Nie <sup>a, b\*</sup>, Xianghai Ran <sup>a, b\*</sup>

<sup>a</sup> Lab of Polymer Composites Engineering, Changchun Institute of Applied Chemistry,  
Chinese Academy of Sciences, Changchun 130022, China

<sup>b</sup> University of Science and Technology of China, Hefei, 230026, China

\* Corresponding Authors.

E-mail address: [wnie@ciac.ac.cn](mailto:wnie@ciac.ac.cn); [ranxh@ciac.ac.cn](mailto:ranxh@ciac.ac.cn)

Tel: +86-431-8526 2580

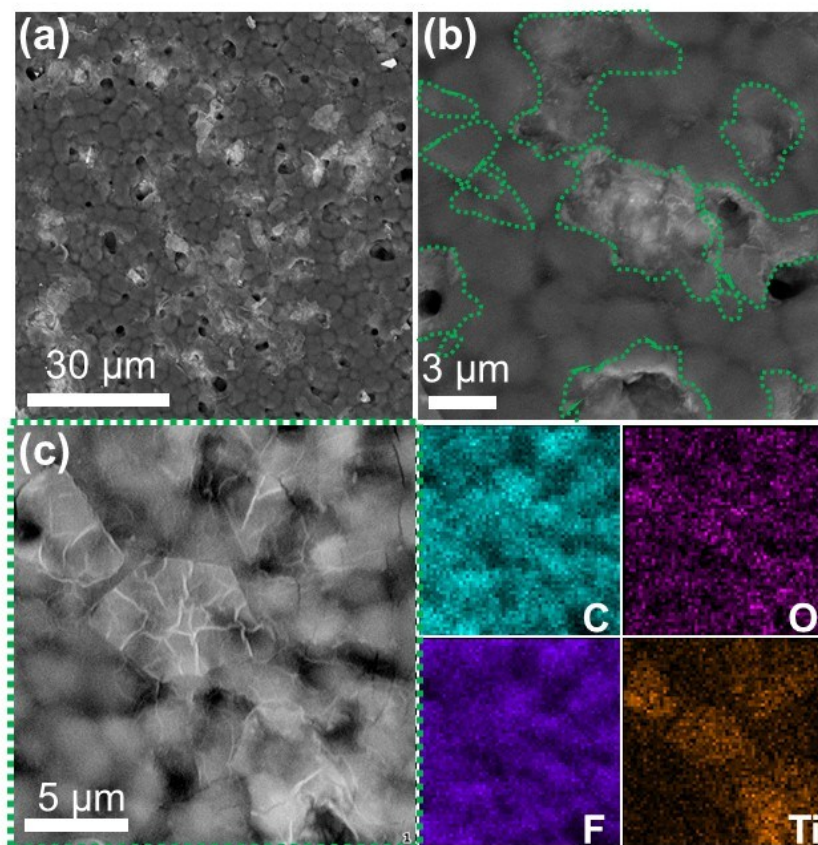

Fig. S1 Surface SEM images of MXene nanosheets on PVDF film with low (a) and (b) high magnification, where  $\text{Ti}_3\text{C}_2\text{T}_x$  nanosheets are marked with green dotted line. (c) The elements mapping images of carbon (C), fluorine (F), oxygen (O) and Titanium (Ti) in the area marked with green dotted line.

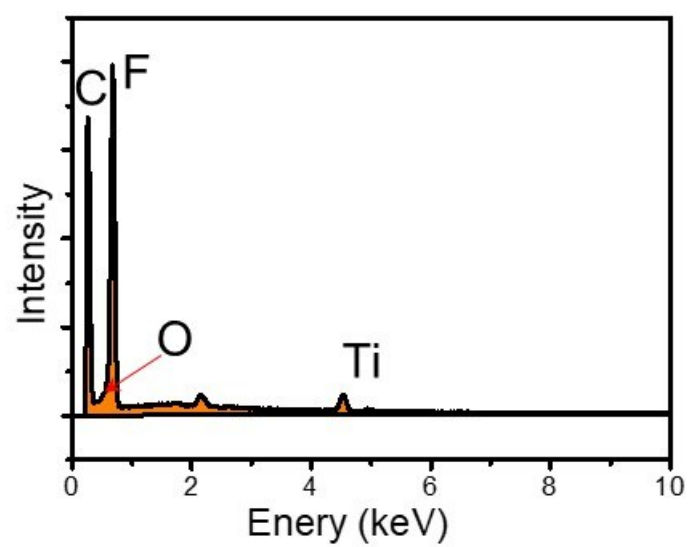

Fig. S2 The energy-dispersive X-ray spectroscopy (EDS) spectrum of MXene/PVDF film
